# Is lineage decision-making restricted during tumoral reprogramming of haematopoietic stem cells?

Geoffrey Brown<sup>1,\*</sup>, Isidro Sanchez-Garcia<sup>2,3,\*</sup>

<sup>1</sup>School of Immunity and Infection, College of Medical and Dental Sciences, University of Birmingham, Birmingham, UK

<sup>2</sup>Experimental Therapeutics and Translational Oncology Program, Instituto de Biología Molecular y Celular del Cáncer, CSIC/Universidad de Salamanca, Campus M. de Unamuno s/n, Salamanca, Spain

<sup>3</sup>Institute of Biomedical Research of Salamanca (IBSAL), Salamanca, Spain

\*These authors have contributed equally to this work

**Correspondence to:** Geoffrey Brown, **e-mail:** G.BROWN@bham.ac.uk  
Isidro Sanchez-Garcia, **e-mail:** isg@usal.es

**Keywords:** *haematopoiesis, leukemia*

**Received:** September 24, 2015

**Accepted:** September 29, 2015

**Published:** October 19, 2015

## ABSTRACT

**Within the past years there have been substantial changes to our understanding of haematopoiesis and cells that initiate and sustain leukemia. Recent studies have revealed that developing haematopoietic stem and progenitor cells are much more heterogeneous and versatile than has been previously thought. This versatility includes cells using more than one route to a fate and cells having progressed some way towards a cell type retaining other lineage options as clandestine. These notions impact substantially on our understanding of the origin and nature of leukemia. An important question is whether leukemia stem cells are as versatile as their cell of origin as an abundance of cells belonging to a lineage is often a feature of overt leukemia. In this regard, we examine the coming of age of the "leukemia stem cell" theory and the notion that leukemia, like normal haematopoiesis, is a hierarchically organized tissue. We examine evidence to support the notion that whilst cells that initiate leukemia have multi-lineage potential, leukemia stem cells are reprogrammed by further oncogenic insults to restrict their lineage decision-making. Accordingly, evolution of a sub-clone of lineage-restricted malignant cells is a key feature of overt leukemia.**

## INTRODUCTION

An important question regarding stem and progenitor cells choosing a developmental route is whether the routes these cells follow to a mature cell type are invariant or versatile. By versatility, we mean the extent to which there are alternative pathways to a cell type and whether cells that have developed part of the way along a lineage pathway can be diverted along a different lineage pathway. In this case, the alternative pathway fate options might be viewed as clandestine. Overall the question is one of mutability of cell fate: in other words, the extent to which cells can readily reprogram their lineage potential(s). In 1987, Shankland described flexibilities to developmental pathways in the embryo of the leech [1]. Cells can use alternative pathways to give rise to an end cell phenotype and this versatility can also be latent. Neurons and

epidermal specifications normally descend from the 'p blast' group of precursors, but when the 'p blast' lineage is ablated the 'o blast' cells then give rise to neurons and epidermal cells. This adaptation of the 'o blast' cells to a new pathway means that lineage pathways are open to reprogramming during normal leech development.

Strikingly similar findings have emerged from recent studies of mouse stem cells. Studies by Chan and co-workers have shown that quite unexpected cell types can alter their lineage fate [2]. Cells residing within the femoral growth plates of bone and that express the haematopoietic cell surface marker Tie2 are not able to form bone, cartilage or stroma. Adipose tissue contains high numbers of Tie2<sup>+</sup> cells and collagen sponges containing recombinant bone morphogenic protein 2 (BMP-2) were inserted into the inguinal fat pad of a reporter mouse (Tie2Cre x MTMG) that labels Tie2 cells

with GFP and other cells with RFP. Ossicles provoked by BMP-2 and harvested a month later contained Tie2-derived (GFP positive) and Tie2-negative-derived (RFP positive) osteocytes, indicating both these cell populations had undergone a shift to a skeletal fate. The use of a parabiont model (actin-GFP transgenic/non-GFP congenic) showed that circulating cells had not contributed to the BMP2-driven formation of ectopic bone. In essence, BMP-2 appears to have reprogrammed Tie2<sup>+</sup> and Tie2<sup>-</sup> cells resident in the extra-skeletal site, inferring flexibility in the programme status of these cells. These data also highlight the importance of environmental niches to the regulation of choice of lineage pathways.

### **The heterogeneity and versatility of haematopoietic stem and progenitor cells**

The mammalian blood cell system provides developmental biologists with one of the best models for unravelling how a stem cell – the haematopoietic stem cell (HSC) – gives rise to the many different types of cells of the blood and immune systems. Information gained about the nature of cell compartments to developmental progression led to definition of the cellular origins of the various types of leukaemia. The haematopoietic and skeletal systems have a similar architecture, adhering to a multi-potent stem cell giving rise to a variety of well-compartmentalised down-stream progenitors that are becoming progressively restricted in their lineage capacities. In recent years, our viewpoint on the architecture of haematopoiesis has changed to take into account the idea that haematopoietic stem and progenitor cells (HSPC) are more versatile than previously thought [1, 3, 4].

Since the 1980s, the model generally used to describe haematopoiesis is an invariant cell lineage tree for developing progenitor cells. The tree depicts a series of binary decisions [5]. The first of these is the HSC makes an immediate, and irrevocable, choice between the myeloid and lymphoid pathways of development, as evidenced by the existence of a common myeloid progenitor (CMP) and common lymphoid progenitor (CLP) (Figure 1A) [6, 7]. CMP and CLP follow preferred routes to a particular cell fate; with these evidenced by colony-forming cells (CFC) which give rise to certain types of mature cells when bone marrow cells are dispersed in semi-solid medium. These include, colonies containing a variety of cell types, for example, granulocyte/erythrocyte/ megakaryocyte/ macrophage-CFC. Colonies containing only two types of cells such as granulocyte/monocyte-CFC identify a bipotent granulocyte/monocyte progenitor cell (GMP).

Whether the ‘classic’ model is an accurate depiction of haematopoiesis has been questioned by the identification of sub-groups of haematopoietic progenitor cells (HPC) with lymphoid potentials and only a sub-set of

myeloid potentials. These cells include early progenitors with lymphoid and myeloid potential (EPLM) [8] and lymphoid-primed multipotent progenitors (LMPP) [9] which have lymphoid potentials and myeloid potentials excluding those for erythroid and megakaryocyte development. The identification of EPLM and LMPP excludes a strict schism as to separate programming of myeloid and lymphoid fates as HSC do not pass through an obligatory CMP *versus* CLP phenotype [10]. Whilst EPLM and LMPP preclude this strict dichotomy they do not contravene the clear existence of CMP and CLP. Instead, the main point is that the combination of partial myeloid fates and lymphoid fates within EPLM and LMPP span the fate potentials of CMP and CLP, respectively. To extend this notion, there might well be a plethora of intermediate HSC-derived HPC with different combinations of differentiation options. The options available to HPC have been revealed using *in vitro* clonogenic assays and by the extent to which cell lines that typify immature cells can be manipulated by culture conditions (growth factors, retinoids and phorbol ester) to differentiate along various pathways [reviewed in 3]. Indeed, there is a striking array of progenitors and cell lines with different combinations of lineage options. To add to this variability, many of the known HPC that are viewed as homogenous might be an admixture of cells and markers are lacking to resolve sub-populations. The use of a combination of markers and of *in vivo* assays has revealed HSC to be a heterogeneous population of cells: HSCs that are platelet-, myeloid- and lymphoid-biased have been described [11–14].

In addition to sub-dividing HSC, the presence of lineage biases within these cells brings to attention two interesting notions. First, the biases having originated in HSC might be presumed to persist in their progeny. In keeping with this, new markers and combinations of markers are likely to reveal such heterogeneity within HPC. Second, HSC appear to display a developmental propensity to differentiate readily and irrepressibly diversify and differentiate. In fact, they do so when cultured with appropriate growth and survival factors and, as considered later, some of these growth factors instruct fate adoption.

Whilst fate options occur in varied combinations there is order to the sets of fates available to individual cells. Our own viewpoint on haematopoiesis is to not draw strict lines representing routes from HSC *via* their progeny to end cell types. The pair-wise model shows a series of invariant pair-wise developmental relationships, with the fate choices available to HSC as a continuum [10] (Figure 1B). The ordering of near-neighbours relates to the sets of potentials available to various known oligopotent HPC [reviewed in 3, 10], as represented by the arcs in the figure. The pair-wise model accommodates lineage-biased HSCs that are platelet-, myeloid- and lymphoid-biased which are also interesting as to targets for transformation in leukaemia.

## Multiple routes, clandestine options and lineage reprogramming

Direct evidence to support the notion that progenitor cells can use more than one route to generate a type of mature cell comes from the experiments undertaken by Ishikawa and co-workers [15]. These workers purified CLP and CMP and derived dendritic cells (DC) *in vitro* from both the cell populations. The transcription profiles of the

two DC populations were the same, supporting alternative lymphoid and myeloid routes to DC. Less direct support comes from examining the fates available to various progenitors and configuring the number of possible routes to an end cell type by virtue of which progenitors are or are not able to give rise to one another [reviewed in 3]. Using this approach, the known and possible routes for the development of neutrophils and monocytes are shown in Figure 2. For example, pathways to mature neutrophils

**A**

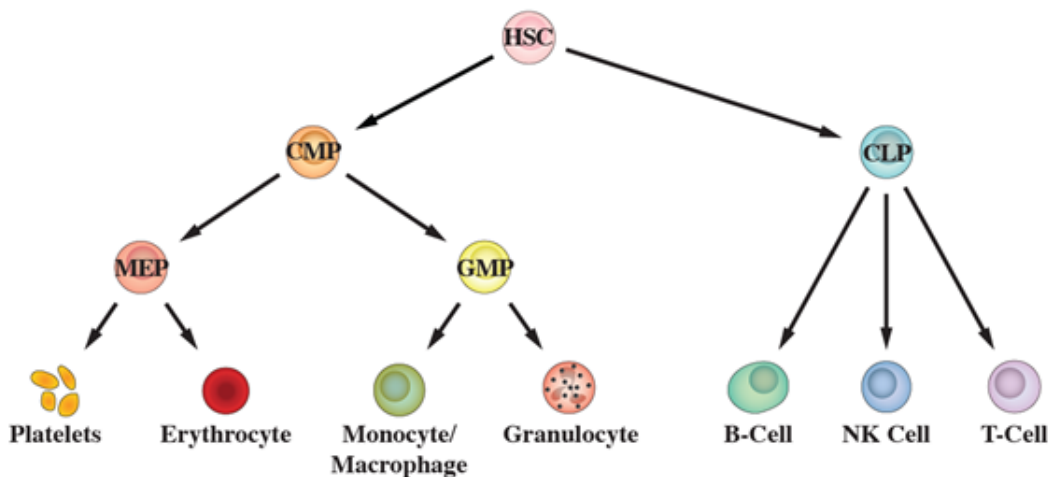

**B**

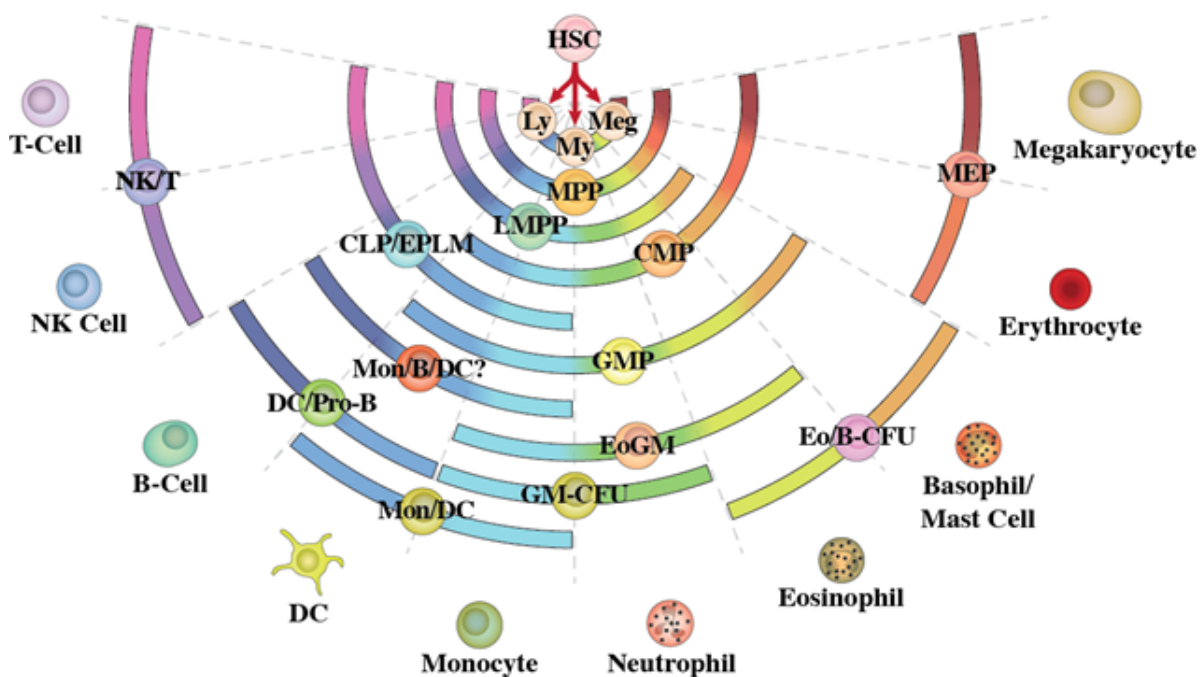

**Figure 1: Schematic representations of haematopoiesis.** (A) Depicts the classic model in which the haematopoietic stem cell makes an irrevocable choice between the myeloid and lymphoid pathways. (B) Depicts the pair-wise model. Differentiation options are envisaged as a series of invariant pair-wise developmental relationships with cells becoming gradually biased towards producing one cell type or another.

A

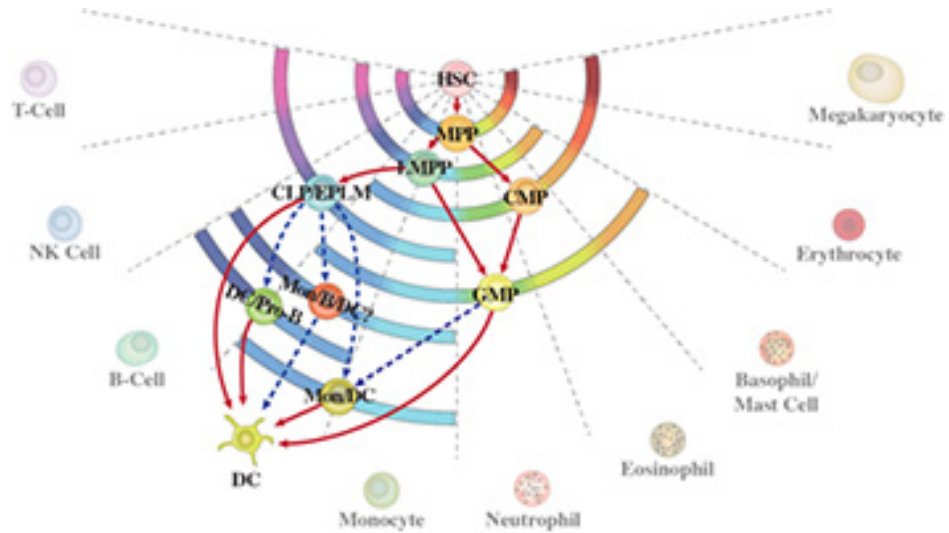

B

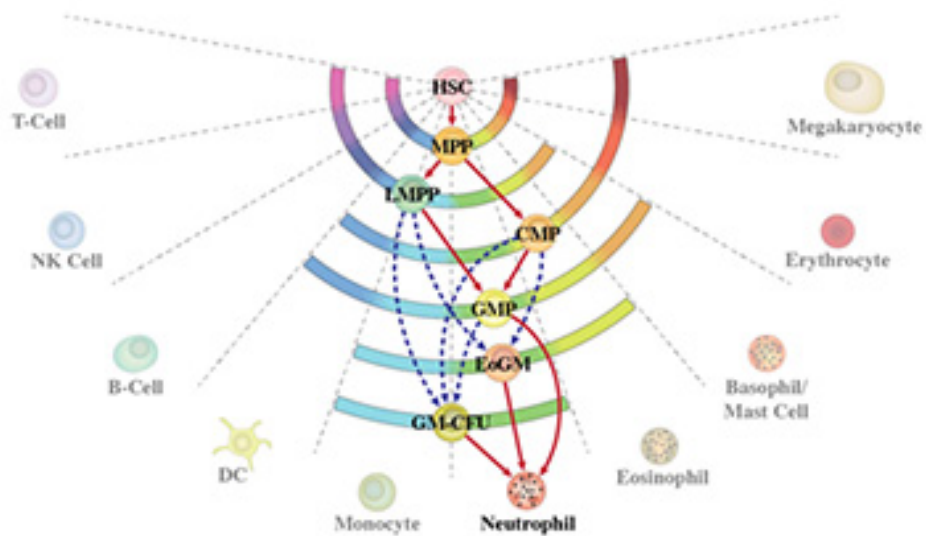

C

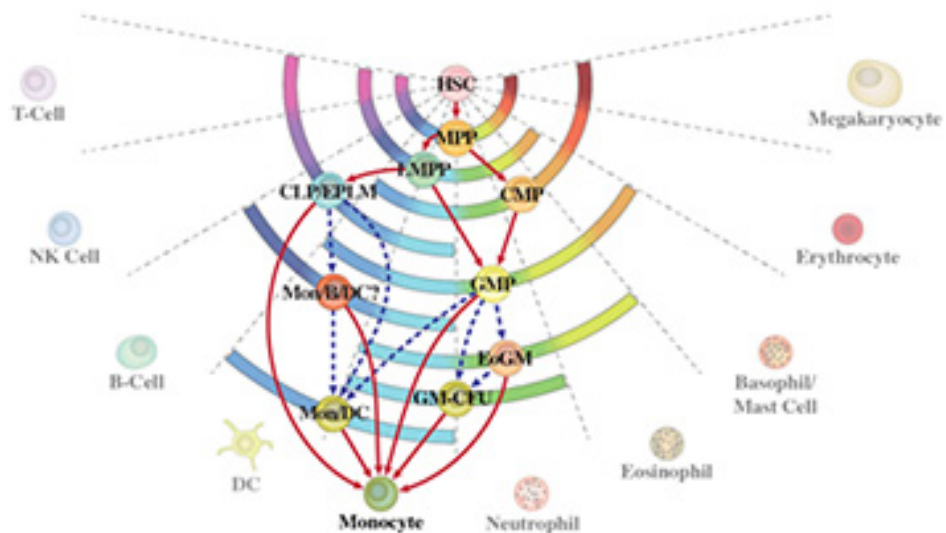

**Figure 2: Alternative routes to dendritic cells, neutrophils and monocytes.** (A) The alternative routes to dendritic cells relate to the generation of these cells from either the common myeloid progenitor or the common lymphoid progenitor. (B) and (C) Routes to neutrophils and monocytes are either known routes from studies of progenitor cells (solid lines) or inferred by virtue of which known progenitors are or are not able to give rise to one another regardless of whether such has been traced.

include *via* LMPP, which have lymphoid in addition to myeloid potentials, and *via* CMP, which do not give rise to lymphocytes.

Some of the new models that challenged a lymphoid/myeloid dichotomy depict more than one route to an end cell type. In redefining lymphoid progenitors in 2002, Katsura mapped myeloid cells arising from a myeloid-T-cell progenitor and a myeloid-B-cell-progenitor in addition to from CMP [16]. Ye and Graf mapped two branches to granulocytes and monocytes, with one largely giving rise to granulocytes and monocytes and the second giving rise to these cells and platelets and erythroid cells [17]. An entirely new way of viewing flexibility of and reprogramming of cell lineages was presented in the ‘myeloid-based’ model by Kawamoto and Katsura [18]. These workers proposed HSC follow a ‘prototypic’ myeloid developmental pathway and these activities are then modified or switched off for HPC to undergo more specialised lymphoid development. Though the extent various routes are used *in vivo* remains uncertain, their existence supports the notion of lineage versatility.

Commensurate with the notion of multiple routes is HPC that have developed some way along a pathway retain other fates as clandestine options. This is best illustrated by the development of progenitors from bone marrow that seed the thymus to undergo T cell development, termed thymus-settling progenitors (TSP). These cells can give rise to B lymphocytes, natural killer cells, myeloid cells and dendritic cells [19–22], as revealed by culturing cells in appropriate conditions. B lymphocyte potential is lost early during T cell development, as TSP become early thymocyte progenitors (double negative (DN) 1 cells). Cells at the DN1 and subsequent DN2 stages of development can still give rise to natural killer cells, myeloid cells and dendritic cells [19–21], with loss of these potentials as DN1 progress to the DN3 stage of

T cell development (Figure 3). Whilst the extent to which developing TSP are diverted *in vivo* is uncertain these cells can clearly reprogram their fate.

### The importance of environmental signals to lineage programming

Not only are HSC and progenitors heterogeneous, but they also reside in a variety of microenvironments in which they interact with local stromal cells and receive signals from cytokines. These influences are now seen to be important to lineage programming of HSPC. The strength and duration of environmental signals, such as Notch, and presence of haematopoietic cytokines, such as macrophage colony-stimulating factor (M-CSF) and FLT3 ligand (FLT3L), influence the types of cells that, for example, developing thymocyte progenitors and EPLM give rise to *in vitro*. In early studies, whether signals consolidated the choice of lineage pathway or were instructive was unclear. Haematopoietic cytokines have long been viewed as providing signals for cell survival and proliferation. However, some are now clearly seen to instruct lineage fate decisions. Recently, Tsapogas and co-workers have shown that a certain threshold level of FLT3L drives multipotent progenitors towards myeloid/lymphoid fates at the expense of megakaryocyte/erythroid fates [22]. For many years, Metcalf championed instructive roles for granulocyte/macrophage colony stimulating factor (GM-CSF) and macrophage colony stimulating factor (M-CSF) in guiding granulocyte/macrophage colony forming cells towards granulocytes and macrophages, respectively [23]. In 1991, he showed a combination of GM-CSF or multi-colony stimulating factor, with stem cell factor, increased the frequency of granulocyte progenitors in blast cell colonies established from normal bone marrow cells [24]. In 2009, Reiger

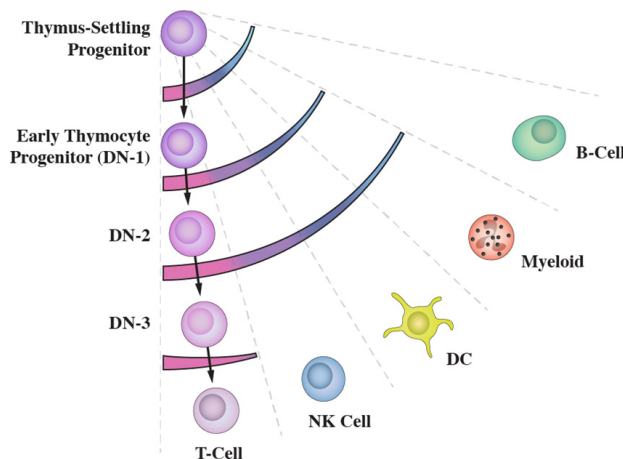

**Figure 3: Developing thymus-settling progenitors retain clandestine options.** The sets of fate options available to thymus-settling progenitors as they differentiate towards T lymphocytes are shown by the arcs. They are revealed by culturing cells in appropriate conditions.

and co-workers confirmed instructive roles for M-CSF and G-CSF by showing these cytokines instruct individual GMP to adopt monocytic or neutrophilic fates, respectively [25]. M-CSF also instructs some long term-HSC (LT-HSC) to express myeloid associated genes [26]. Erythropoietin instructs erythroid fate as revealed by skewing of the potential of LT-HSC towards this fate and priming of erythroid lineage-associated genes in these cells [27].

As outlined above, the architecture of the haematopoietic system is far less compartmentalised and more complex, particularly in terms of lineage versatility, than previously thought. Developing HPC can use alternative pathways and have clandestine potentials, indicating that the natural propensities of HSPC are to diversify and versatility. This is in keeping with most of biology is Darwinian in nature. The presence of lineage biases within HSC might well extend to known HPC with each being a mixture of cells with differently biased differentiation capacities. Moreover, developing haematopoietic cells appear to be gradually biased towards producing one cell type or another which transforms our view of the nature of commitment in HSPC. In other words, lineage commitment isn't a stepwise all-or-none event, whereby pluripotent and/or oligo-potent populations of cells continuously produce committed offspring. And importantly, the biases can be overridden by environmental factors. All of the above have implications to the origins of and progression of malignant transformation. Below we examine whether transformed cells adhere to the above tendencies or have a more restricted phenotype overall.

### The architecture of leukemia: haematopoiesis and leukemia are both hierarchically organized processes

In the last years, we have seen the coming of age of the "leukemia stem cell" (LSC) theory. This has led to leukemia as a hierarchically organised process and renewed interest in whether aberrant cell differentiation lies at the root of cancer. From this point of view, a comprehensive knowledge of the aberrations to developmental mechanisms whereby normal target cells acquire this tumor characteristic is essential to understand leukemia [28]. Cytogenetic and molecular genetic analyses have defined genetic events that are consistently associated with each of the various types of cancer [29]. Particular genetic alterations are associated almost exclusively with a subgroup of human cancer that has a distinct phenotype (Figure 4). These genetic lesions are of clinical importance, and they may serve as unequivocal diagnostic markers, but they have also provided important clues to the cellular mechanisms behind leukemia development. The genotype-phenotype correlations established in human leukemias have demanded during the last three decades that we explain the nature of the intimate association between each genetic lesion and the phenotype (particular type of leukemia) with which it is associated [30].

Two different hypotheses have been considered to explain the link between genotype and the set phenotype of tumor cells (Figure 5). In the classical view of the initiation and progression of leukemia, an initiating

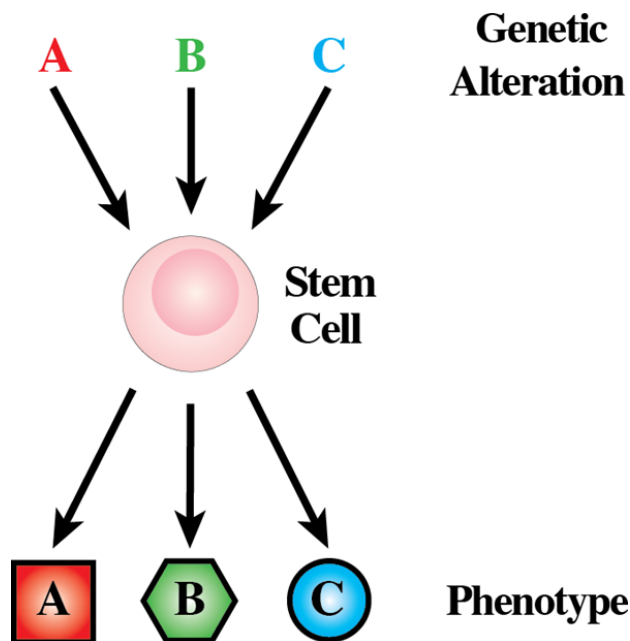

**Figure 4: Genotype-phenotype correlations are established in human leukemias.** The expression of each one of the genetic lesions associates almost exclusively with a characteristic subgroup of human leukemias.

genetic alteration takes place that is required for the immortalization of a committed/differentiated target cell (Figure 5B). Such cells will afterwards acquire additional genetic hits over time. The acquisition of additional hits aggravates the deregulation of the behavior of the differentiated target cell, leading to the clinically recognized features of leukemias. This is the model that has traditionally underpinned the study of leukemogenesis and takes for granted that the phenotype, in terms of the differentiated attributes of the tumor cells, reflects that of the normal cell that gave rise to the tumor in the first place. In most cases, cancerous cells do share similarities with non-pathological differentiated cell types. Therefore, for every kind of cancer, the cell of origin was assumed to be the corresponding normal differentiated cell. However and for some time, there have been some classical examples in which this is clearly not the case. Chronic myelogenous leukaemia (CML) presents as an abundance of relatively mature neutrophils and Fialkow and colleagues suggested nearly 40 years ago that this disease arises from transformation of a rare HSC. The evidence for this is the t(9;22) chromosomal translocation which typifies CML and can be found in most types of differentiated haematopoietic cells in patients [31]. During the chronic phase of CML the malignant stem cell clone is channelled towards producing neutrophils, and, in essence, the non-myeloid cells are not behaving in a malignant and clonally expansive manner. Another way of interpreting the genotype-phenotype correlations observed between genetic lesions and a given tumoral phenotype is to consider the possibility that the oncogene is directly responsible for imposing the specific characteristics of the leukemia phenotype (Figure 5C).

### **Leukemogenesis: an inappropriate lineage-decision making process**

There are striking findings that suggest that *tumoral reprogramming and aberrant lineage-programming* are key features of the origin of cancers and leukemias. Malignant glioblastoma neural stem cells can be reprogrammed to induced-pluripotent stem cells (iPSC). These iPSC can differentiate into mesodermal lineages, and when they do so they lose their malignant nature, but they maintain their malignant status when they differentiate along neural pathways [32]. Similarly, the differentiation block is overcome in primary human Philadelphia chromosome-positive B cell acute lymphoblastic leukemia (B-ALL) cells by reprogramming cells into non-leukemic macrophages [33]. The importance of these findings is that the malignancy status is somehow linked to the cells having been programmed to adopt a lineage pathway. Key questions are the developmental stage, as to stem and/or progenitor cells, which is being programmed to this effect and at what stage does this occur in relation to the progression of the development of leukemia.

During leukemogenesis a normal cell acquires a new but inappropriate (malignant) identity to give rise to a clonal aberrant population. This is only possible if the normal cell that gives rise to the leukemia, the leukemia cell-of-origin (LOC), has the necessary plasticity to undergo change. Also, the oncogenic event(s) initiating cancer must have an inherent reprogramming capacity, to be able to lead to the change in cellular identity [28]. The molecular mechanisms underlying this aberrant decision-making process are the pathological aberrations of the normal processes that regulate the developmental programming and plasticity of cells and that must operate to drive experimentally-induced reprogramming of mature cells to iPSCs. As to the capacity of an oncogenic insult to reprogram cells, it is generally accepted that tumoral progression is a multi-hit process. In this case different aspects of normal cellular biology are progressively altered to finally give rise to a full-blown tumor [34]. As mentioned above, developing normal HSPC are guided towards lineage biases, diversifying and differentiating towards their end-stage cells. The multi-hit requirement for full tumor development can be related to the notion that changes which are necessary for reprogramming cells to reverse a differentiated state to full pluripotency are inherently disfavoured developmentally. In both cases, biological barriers exist to prevent cells from changing their identity in this manner in order to avoid the risk of malignant transformation.

Evidence to support the inherent resistance of normal cells to reprogramming by an oncogene to a tumour phenotype comes from recent studies of stem-cell based animal models of human cancer. Loss of p53 is a frequent occurrence in malignancy and facilitates pathological reprogramming to a malignant phenotype as follows. In a stem-cell based transgenic model of multiple myeloma, the loss of p53 accelerated the appearance of disease by allowing the *MafB* oncogene to drive a much more efficient malignant transformation [35, 36]. Something similar happens in the case of mucosa-associated lymphoid tissue (MALT) lymphoma that is driven by the *MALT1* oncogene [37]. As to restoring activity of p53 protein and the effect on malignancy, a sophisticated approach has been the use of a knock-in mouse model carrying the modified p53 protein p53ERTAM. This can be switched on and off *in vivo* by tamoxifen administration or withdrawal, respectively. In a stem-cell based model of CML [38], restoration of p53 activity slowed the progression of the disease and extended the survival of leukemic animals by inducing the apoptotic death of primitive leukemic cells.

The relevance of reprogramming and lineage decision-making to malignancy is also illustrated by consideration of the action of retinoic acid receptors (RARs), particularly RAR $\gamma$ . These receptors, for the natural ligand all-*trans* retinoic acid, have long been known to play important roles during development. The oncogenic potential of RAR $\gamma$  was revealed by

studies of hepatocellular carcinoma [39]. As to a link to lineage reprogramming, addition of RAR $\gamma$  to the four transcription factors (Oct4, Sox2, Klf4 and c-Myc) used to reprogram somatic cells to iPSCs cells greatly accelerated reprogramming of mouse embryonic fibroblasts [40]. The importance of activity of RAR $\gamma$  to decision-making by stem cells is seen in studies of zebrafish development. Treatment of zebrafish embryos with a RAR $\gamma$ -specific agonist adversely affected the development and growth of tissues that form from neural crest and lateral plate mesodermal stem and progenitor cells that express RAR $\gamma$ . These studies revealed that RAR $\gamma$ , which can play a role in cell reprogramming,

has to be inactive at the stem/progenitor stage of development for these cells to make an appropriate decision to differentiate along a pathway [41].

### The cell of origin in leukemia

Accepting that leukemia is a hierarchically organized tissue maintained by leukemia stem cells (LSCs), it becomes essential to identify the normal cell which first suffers the oncogenic alteration that will finally lead to the generation of the LSC (Figure 6). This LCO must possess sufficient plasticity to allow

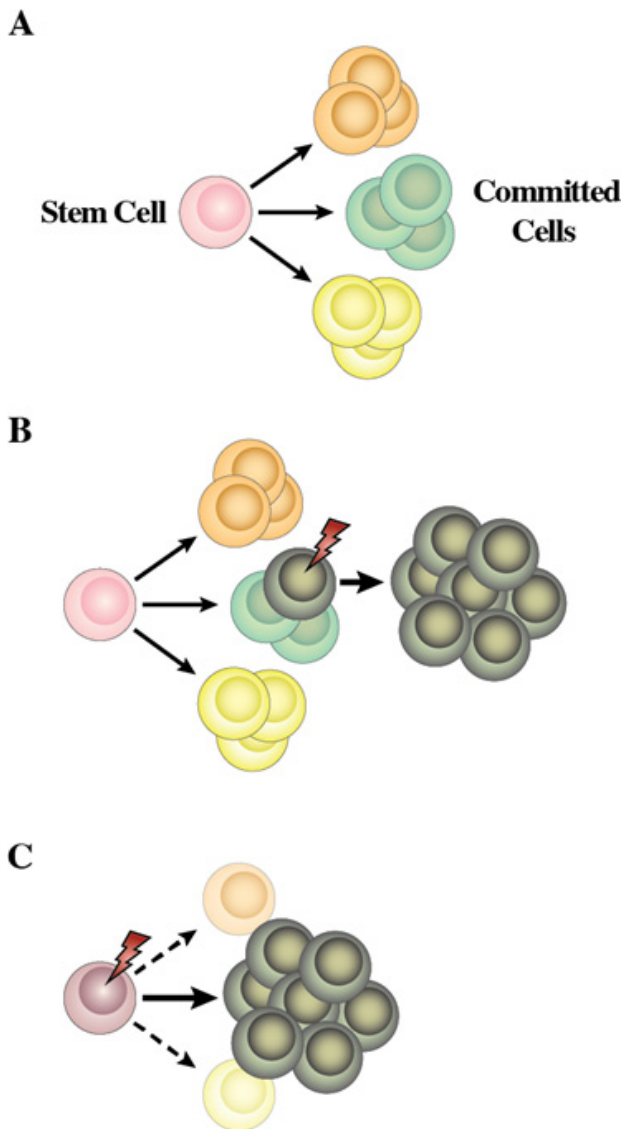

**Figure 5: Proposed model for the role of human cancer gene defects in cell lineage specification.** (A) During haematopoiesis a small pool of multipotent stem cells maintain multiple cell lineages. (B) Traditionally, human leukemia genetic defects have been thought to act on cells already committed to a differentiation program. Hence, the leukemia phenotype closely resembles that of the initial differentiated target cell. (C) Normal uncommitted stem and progenitor cells are the targets for transformation in some human leukemias and the human leukemia-gene defects into these cells are the instigators of lineage choice decisions. Consistent with this is forced expression of these genes in stem cells can select or impose a specific leukemic-lineage outcome. This explains why specific gene defects are found only in one type of leukemia (see text for details).



the tumoral reprogramming to take place or, at least, to be initiated. The characteristics of the final leukemia will be the result of the interaction between the reprogramming capacity of the oncogene(s) and the susceptibility of the LCO to reprogramming. As mentioned above, it was assumed that the phenotype of the leukemia cells reflects that of the normal cell from which they originated [30], and that, therefore, the characteristics of leukemia cells were more or less a caricature of their cell of origin. Accordingly, the cell of origin was always sought among those most similar to the cancerous one. However, all the evidence accumulated over the last years has led to a different point of view that leukemias are a stem cell-based tissue [42–44]. In this case, only some of the cells within the tumor, namely the LSC can regenerate the leukemia mass and the phenotype of the tumoral differentiated and partially differentiated cells might be largely unrelated to the cell that originates the LSCs. The LCO would be the cell by the process of tumoral reprogramming that will finally lead to the generation of the LSC which is the only one that can (re)generate the tumor.

One option is that LSCs could have their origin in normal stem cells, maintain stem cell properties and

become pathologically reprogrammed *via* a mutational event (Figure 6). In the case of CML, the tumor-driving mutation is the chimeric oncogene *BCR-ABLp210*. It has long been known that *BCR-ABLp210* is present in all the hematopoietic lineages and can also be traced back to their HSCs. Importantly, the oncogenic effect only manifests in the myeloid lineages, at least during the chronic phase [45]. The stem cell origin of CML has been recently confirmed using a stem-cell based animal model in which expression of the *BCR-ABLp210* oncogene is restricted to the stem cell stage of development in a genetically engineered mouse [43, 46]. Despite this restricted expression window, *BCR-ABLp210* induces a full-blown CML in the mice, with all the cellular and tissue characteristics of the human disease including cells differentiating towards neutrophils. Importantly, the differentiated CML cells do not express the oncogene but have a tumoral phenotype, therefore indicating that tumoral reprogramming took place at an earlier developmental level [43, 46]. Similarly, in transgenic mice in which the expression of different oncogenes is restricted to the stem/progenitor cells, mice develop specific leukemias/lymphomas that very closely recapitulate the main features of human disease [36, 37, 46–48]. However, heterogeneity seems to be

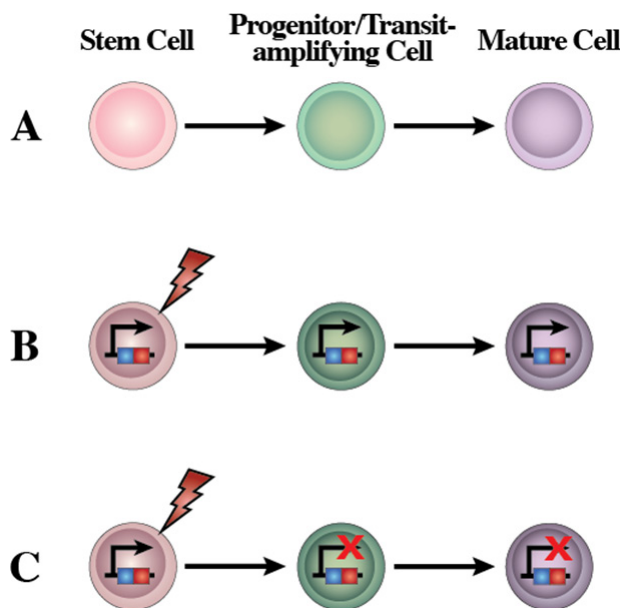

**Figure 6: A new concept of the human leukemia as a result of a restriction of lineage options during stem cell transformation.** (A) Scheme of the normal differentiation program from stem cells. Normal stem cells give rise to transit cells which expand to give rise to terminally differentiated cells. (B) Human leukemia is a genetic disease originated by several possible types of genetic/epigenetic alterations. LSC give rise to transit-amplifying cells that would expand and originate the main and highly expansive tumor cell mass. All human leukemic cells carry the oncogenic alteration, from the cell-of-origin to the more differentiated cancer cells, though the role of this oncogene may be different at different stages of leukemia differentiation, and these mutations might become carrier mutations rather than driving ones depending on the cellular context. (C) Based on the reprogramming nature of oncogenes, restricting expression of the oncogenic alterations to the stem cell compartment is all that is needed to recapitulate the heterogeneity of leukemia. Using a stem-cell restricted transgenic expression system, the expression of the oncogene in the reprogramming-prone stem cells and progenitors allows the development of all of the cells that compose the leukemia mass. The modified gene is present in all the mouse cells but the oncogene impact is limited to the stem/progenitor compartment. This is similar to what happens in other cases of reprogramming, where the reprogramming factor(s) does not need to be present anymore once the initial fate-inducing change has taken place (for example, induced pluripotency).

restricted to the initial stages of chronic leukemia and tumors and importantly sub-clones mainly determine tumor progression and therapeutic outcomes [49, 50].

Further support to the notion that leukemias largely arise from stem cells is their longevity predisposes to malignant transformation. Recent advanced technologies including next-generation sequencing analysis have enabled us to identify frequently occurring somatic mutations in many hematological malignancies including leukemias and lymphomas [51–69]. It is important to note that only cells with a long lifespan can accumulate these mutations. In regard to haematopoiesis, the HSCs are the main critical cellular targets and it is known that the number of acquired somatic mutations in HSC increase with age [70]. HSCs carrying these mutations can produce a number of myeloid or lymphoid progenitors that have identical abnormalities and these progenitors can be the final target for the transformation of LOCs into LSCs in acute leukemia [71]. As outlined above, the *BCR-ABLp210* fusion protein can drive HSCs to give rise to the chronic phase of CML. However, during myeloid blast crisis in CML, additional genetic abnormalities can transform GMP into LSCs. In *t* (8; 21) AML, the AML1–ETO fusion is found in HSCs; these AML1–ETO<sup>+</sup> HSCs can differentiate into mature blood cells [72, 73]. Additional KIT mutations at the GMP stage seem to be critical for the formation of AML LSCs [74]. Furthermore, next-generation sequencing analyses have shown that pre-malignant clones carrying somatic mutations have been frequently found in HSCs of patients with AML without specific chromosomal abnormalities [75, 76]. Thus, HSCs are a reservoir for mutations at least in myeloid malignancies [77].

In contrast, the involvement of HSCs had not been considered in lymphoid malignancies within the recent past. However, it has been reported recently that in mature lymphoid malignancies, such as chronic lymphocytic leukemia (CLL), the cellular propensity for clonal B cell development has been achieved at the HSC level [78, 79]. And, the genetic alterations specific for T cell lymphoma [80, 81], follicular lymphoma [82, 83] and hairy cell leukemia [84] can be traced back to the HSC stage. These studies have suggested that even in relatively mature lymphoid malignancies, human HSCs could be the reservoir for genetic mutations, which constitutes a prime source for lymphoid malignancy development. The outcomes are cells that are veered towards particular developmental pathways. In addition to the detailed analysis of LCO in primary human lymphoid malignancies, murine models of mature B-cell malignancies have been successfully established by targeting HSCs; the ectopic expression of disease-specific oncogenes such as *BrafV600E*, *MALT1*, *MafB*, *HGAL*, and *Bcl6* within HSCs successfully reproduces the nature of the mature lymphoid malignancies [36, 37, 47, 48, 84]. Importantly, when these oncogenes have been expressed

within cells committed to the B-cell lineage the mice failed to develop the lymphoid malignancy. These studies support the hypothesis that mature lymphoid malignancies may be initiated by an inappropriate lineage-decision making process at the HSC level.

### Restriction of lineage options during stem cell transformation

Normal HSCs are characterized by their multilineage differentiation potential. The pre-LSCs of many leukemias exhibit multilineage potential and differentiation, as mentioned above, pre-LSC CML associated with *BCR-ABL* fusion exhibit multilineage differentiation whereby mature granulocytes, monocytes, erythrocytes, platelets and B lymphocytes are all part of the malignant clone (Figure 7A). Similarly, in CML associated with a mutant *RAS* allele, the mutant *RAS* can be found in granulocytes, monocytes, B lymphocytes and T lymphocytes, indicating also the presence of a multipotent pre-LSC. In myelodysplastic syndromes, a multipotent malignant stem cell is implicated in patients with refractory anemia (RA), RA with ringed sideroblasts or RA with excess blasts. The presence of pre-LSC with multilineage differentiation potential suggests the occurrence of initiating mutations in a normal HSC. Only upon the acquisition of further mutations the initiated LCO evolves to produce a sub-clone of lineage-restricted malignant blasts (Figure 7B). This fits with a two-hit model of leukemogenesis, which posits the stepwise acquisition and collaboration between mutations that activate signal-transduction pathways to confer a survival or proliferative advantage (e.g. mutations in *FLT3*, *RAS* or *KIT*) and mutations in genes coding for transcriptional regulators that potentially restrict lineage options (e.g. generation of novel oncogenes such as *RUNX1-RUNX1T1* or *PML-RARA*, *BCR-ABLp190*, *ETV6-RUNX1* or mutations in *CEBPA*, *PAX5* or *NPM1*). In keeping with this are cases in which a pre-leukemia lesion exists stably as a single aberration in an abnormal cell population that will only progress to an open leukemia when secondary hits occur.

### Targeted therapies fail to eradicate LSC and the prospect of reprogramming these cells

Current therapies fail to eradicate LSC, in spite of their apparent efficacy against the main mass of leukemia cells. A possible rationale to this difficulty is as follows. Above we have argued that LSC are generated by a (leukemia) reprogramming of normal HSC to a set (leukemic) phenotype whereby lineage options have been restricted. In this case, the triggering agents, the oncogenes that initiate leukemia formation, might not be required anymore for disease progression once the new circuits have been established and the new fate is set [46, 85]. The initiating lesion is the driving force in the reprogramming process, essential for leukemogenesis. However, once

reprogramming and lineage restriction have taken place the initiating hit is only a passenger mutation within the LSC, either without a significant function anymore or even performing a different role, unrelated to the reprogramming one, in tumor expansion or proliferation. This model can explain why oncogene inhibition through targeted therapies would not affect the LSC compartment.

As a driver to leukemia, reprogramming of HSPC to HSC and to a distinct lineage option circuitry presumably leads to the establishment of a new epigenetic signature. The latter opens a clear hope for treatment as epigenetic modifications, unlike genetic changes, can be manipulated to erase and/or reverse. Indeed, it has already been proven that incorporation of agents that target epigenetic events to the standard chemotherapy is a promising approach to the treatment of relapsed pediatric acute lymphoblastic leukemia [86]. In different experimental settings, the results suggest that cancer cells can be reprogrammed to a non-tumoral fate, losing their malignancy. For example, it is possible to even produce clonal mouse embryos from brain tumors [87] and, by using nuclear transplantation, to reprogram melanoma cells [88] and embryonal carcinomas [89]. As described above, it is clear that reprogramming B-ALL cells to an alternative lineage cell fate can suppress malignancy. These findings indicate that reprogramming tumor cells is a viable prospect. Also, it is to be expected that LSCs from different cancer types will share many similarities, implying that similar LSC-based therapeutic

approaches could be used in many different leukemias. However, as for any other therapeutic approach, a precise knowledge of the epigenetic rewiring is necessary before we can attempt a successful intervention.

### Future opportunities and challenges

For the future, there is a biological paradox we don't really understand, in particular the balance between cell intrinsic and environmental drivers of certain biological processes. Pluripotency, a pre-requisite for versatility, underpins the means of an organism to diversify by evolving different types of specialized cells. However, maintenance of pluripotency is obstructive to the embryonic development of a specialized adult organism from the amorphous mass of cells that is the early embryo. We are moving towards the viewpoint that the architecture of normal haematopoiesis is much more versatile and plastic than previously thought. These attributes are important to responding to the demand provoked by a wide variety of infectious agents as to the specialized cells required to counteract such. We have postulated leukemias, in their full-blown and overt state, are channeled, *via* reprogramming, towards a malignant and more immobile phenotype. Do we see that cancer is the price to pay as to exacerbation of an inherent and selfish-gene propensity to enforce lineage biases which is important to maintenance of the overall *status quo* of the developed adult organism?

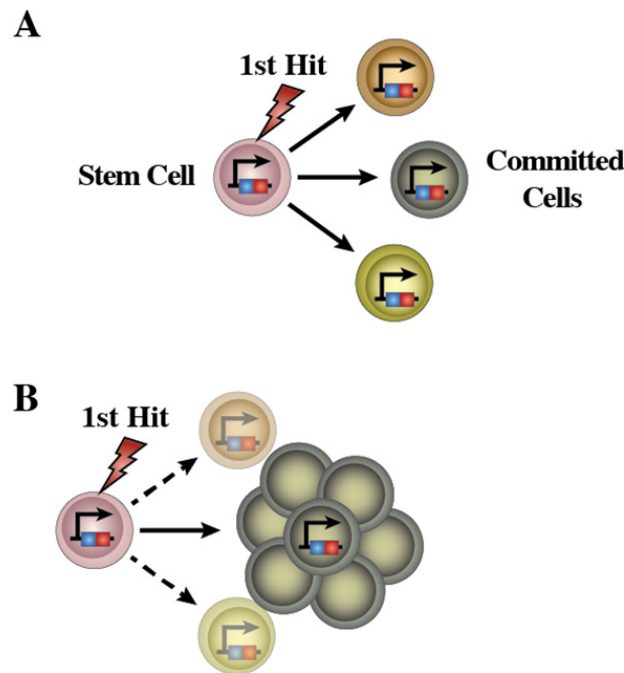

**Figure 7: Schematic representation of the emergence of LSCs in human leukemia.** (A) A mutation occurs in HSCs leading to the emergence of aberrant pre-leukemic HSCs. These aberrant pre-leukemic HSCs self-renew and expand within the HSC compartment. Pre-leukemic HSCs give rise to a high number of lineage-committed progenitors harboring the identical mutations. This leads to an increased chance of acquiring the additional oncogenic events, which finally transform the aberrant progenitor cells from pre-leukemic HSCs into the leukemic stem cells (LSCs). (B) Loss of differentiation potentials is essential for the emergence of LSCs. These sequential leukemia progression models are commonly accepted as to the development process of human acute malignancies.

This ancestral biological drive exists as some organisms have remained unchanged for millions of years.

## ACKNOWLEDGMENTS AND FUNDINGS

We are indebted to all members of our groups for useful discussions and for their critical reading of the manuscript. We thank Ciaran Mooney for drawing final versions of figures. Research in ISG group is partially supported by FEDER and by MINECO (SAF2012-32810, and Red de Excelencia Consolider OncoBIO SAF2014-57791-REDC), Instituto de Salud Carlos III (PIE14/00066), NIH grant (R01 CA109335-04A1), Junta de Castilla y León (BIO/SA32/14 and CSI001U14), the Fundacion Inocente Inocente, the German Carreras Foundation (DJCLS R13/26) and by the ARIMMORA project (European Union's Seventh Framework Programme (FP7/2007-2013) under grant agreement no. 282891). The research leading to these results has also received funding from the People Programme (Marie Curie Actions) of the European Union's Seventh Framework Programme FP7/2007-2013 under Research Executive Agency grant agreement № 315902. GB and ISG are members within the Marie Curie Initial Training Network DECIDE (Decision-making within cells and differentiation entity therapies).

## CONFLICTS OF INTEREST

The authors declare no conflict of interest.

## Editorial note

This paper has been accepted based in part on peer-review conducted by another journal and the authors' response and revisions as well as expedited peer-review in *Oncotarget*.

## REFERENCES

1. Shankland M. Differentiation of the O and P cell lines in the embryo of the leech. II. Genealogical relationship of descendant pattern elements in alternative developmental pathways. *Dev Biol.* 1987; 123:97–107.
2. Chan CK, Seo EY, Chen JY, Lo D, McArdle A, Sinha R, Tevlin R, Seita J, Vincent-Tompkins J, Wearda T, Lu WJ, Senarath-Yapa K, Chung MT, et al. Identification and specification of the mouse skeletal stem cell. *Cell.* 2015; 160:285–298.
3. Brown G, Hughes PJ, Michell RH, Ceredig R. The versatility of haematopoietic stem cells: implications for leukaemia. *Crit Rev Clin Lab Sci.* 2010; 47:171–180.
4. Brown G, Mooney C, Servera LA, von Münchow L, Toellner K-M, Ceredig R, Rolink A. Versatility of stem and progenitors and the instructive action of cytokines on haematopoiesis. *Crit Rev Clin Lab Sci.* 2015; doi 10.3109/10408363.2015.1021412.
5. Weissman IL, Anderson DJ, Gage F. Stem and progenitor cells: origins, phenotypes, lineage commitments, and transdifferentiations. *Annu Rev Cell Dev Biol.* 2001; 17:387–403.
6. Kondo M, Weissman IL, Akashi K. Identification of clonogenic common lymphoid progenitors in mouse bone marrow. *Cell.* 1997; 91:661–672.
7. Akashi K, Traver D, Miyamoto T, Weissman IL. A clonogenic common myeloid progenitor that gives rise to all myeloid lineages. *Nature.* 2000; 404:193–197.
8. Balciunaite G, Ceredig R, Massa S, Rolink AG. A B220 + CD117 + CD19- hematopoietic progenitor with potent lymphoid and myeloid developmental potential. *Eur J Immunol.* 2005; 35:2019–2030.
9. Adolfsson J, Månsson R, Buza-Vidas N, Hultquist A, Liuba K, Jensen CT, Bryder D, Yang L, Borge OJ, Thoren LA, Anderson K, Sitnicka E, Sasaki Y, et al. Identification of Flt3 + lympho-myeloid stem cells lacking erythromegakaryocytic potential a revised road map for adult blood lineage commitment. *Cell.* 2005; 121:295–306.
10. Ceredig R, Rolink AG, Brown G. Models of haematopoiesis: seeing the wood for the trees. *Nat Rev Immunol.* 2009; 9:293–300.
11. Sanjuan-Pla A, Macaulay IC, Jensen CT, Woll PS, Luis TC, Mead A, Moore S, Carella C, Matsuoka S, Bouriez Jones T, Chowdhury O, Stenson L, Lutteropp M, et al. Platelet-biased stem cells reside at the apex of the haematopoietic stem-cell hierarchy. *Nature.* 2013; 502:232–236.
12. Challen GA, Boles NC, Chambers SM, Goodell MA. Distinct hematopoietic stem cell subtypes are differentially regulated by TGF-beta1. *Cell Stem Cell.* 2010; 6:265–278.
13. Gekas C, Graf T. CD41 expression marks myeloid-biased adult hematopoietic stem cells and increases with age. *Blood.* 2013; 121:4463–4472.
14. Shimazu T, Iida R, Zhang Q, Welner RS, Medina KL, Alberola-Lla J, Kincade PW. CD86 is expressed on murine hematopoietic stem cells and denotes lymphopoietic potential. *Blood.* 2012; 119:4889–4897.
15. Ishikawa F, Niuro H, Iino T, Yoshida S, Saito N, Onohara S, Miyamoto T, Minagawa H, Fujii S, Shultz LD, Harada M, Akashi K. The developmental program of human dendritic cells is operated independently of conventional myeloid and lymphoid pathways. *Blood.* 2007; 110:3591–3660.
16. Katsura Y. Redefinition of lymphoid progenitors. *Nat Rev Immunol.* 2002; 2:127–132.
17. Ye M, Graf T. Early decisions in lymphoid development. *Curr Opin Immunol.* 2007; 19:123–128.
18. Kawamoto H, Katsura Y. A new paradigm for hematopoietic cell lineages: revision of the classical concept of the myeloid-lymphoid dichotomy. *Trends Immunol.* 2009; 30:193–200.

19. Porritt HE, Rumfelt LL, Tabrizifard S, Schmitt TM, Zuniga-Pflucker JC, Petrie HT. Heterogeneity among DN1 prothymocytes reveals multiple progenitors with different capacities to generate T cell and non-T cell lineages. *Immunity*. 2004; 20:735–745.
20. Lehar SM, Dooley J, Farr AG, Bevan MJ. Notch ligands Delta 1 and Jagged1 transmit distinct signals to T-cell precursors. *Blood*. 2005; 105:1440–1447.
21. Balciunaite G, Ceredig R, Rolink AG. The earliest subpopulation of mouse thymocytes contains potent T, significant macrophage, and natural killer cell but no B-lymphocyte potential. *Blood*. 2005; 105:1930–1936.
22. Radtke F, Wilson A, Stark G, Bauer M, van Meerwijk J, MacDonald HR, Aguet M. Deficient T cell fate specification in mice with an induced inactivation of Notch1. *Immunity*. 1999; 10:547–558.
23. Metcalf D, Burgess AW. Clonal analysis of progenitor cell commitment of granulocyte or macrophage production. *J Cell Physiol*. 1982; 111:275–283.
24. Metcalf D. Lineage commitment of hemopoietic progenitor cells in developing blast cell colonies: influence of colony-stimulating factors. *Proc Natl Acad Sci U S A*. 1991; 88:11310–11314.
25. Rieger MA, Hoppe PS, Smejkal BM, Eitelhuber AC, Schroeder T. Hematopoietic cytokines can instruct lineage choice. *Science*. 2009; 325:217–218.
26. Mossadegh-Keller N, Sarrazin S, Kandalla PK, Espinosa L, Stanley ER, Nutt SL, Moore J, Sieweke MH. M-CSF instructs myeloid lineage fate in single haematopoietic stem cells. *Nature*. 2013; 497:239–243.
27. Grover A, Mancini E, Moore S, Mead AJ, Atkinson D, Rasmussen KD, O'Carroll D, Jacobsen SE, Nerlov C. Erythropoietin guides multipotent hematopoietic progenitor cells toward an erythroid fate. *J Exp Med*. 2014; 211:181–188.
28. Sanchez-Garcia I. How tumour cell identity is established? *Semin Cancer Biol*. 2015; 32:1–2.
29. Mitelman F, Johansson B, Mertens F, (Eds.). *Mitelman Database of Chromosome Aberrations and Gene Fusions in Cancer*. 2013.
30. Vicente-Duenas C, Romero-Camarero I, Cobaleda C, Sanchez-Garcia I. Function of oncogenes in cancer development: a changing paradigm. *Embo J*. 2013; 32:1502–1513.
31. Fialkow PJ, Jacobson RJ, Papayannopoulou T. Chronic myelocytic leukemia: clonal origin in a stem cell common to the granulocyte, erythrocyte, platelet and monocyte/macrophage. *The American journal of medicine*. 1977; 63:125–130.
32. Stricker SH, Feber A, Engström PG, Carén H, Kurian KM, Takashima Y, Watts C, Way M, Dirks P, Bertone P, Smith A, Beck S, Pollard SM. Widespread resetting of DNA methylation in glioblastoma-initiating cells suppresses malignant cellular behavior in a lineage-dependent manner. *Genes & Development*. 2013; 27:654–669.
33. McClellan JS, Dove C, Gentles AJ, Ryan CE, Majeti R. Reprogramming of primary human Philadelphia chromosome-positive B cell acute lymphoblastic leukemia cells into nonleukemic macrophages. *Proc Natl Acad Sci U S A*. 2015; 112:4074–4079.
34. Hanahan D, Weinberg RA. Hallmarks of cancer: the next generation. *Cell*. 2011; 144:646–674.
35. Vicente-Duenas C, Gonzalez-Herrero I, Cenador MB, Criado FJ, Sanchez-Garcia I. Loss of p53 exacerbates multiple myeloma phenotype by facilitating the reprogramming of hematopoietic stem/progenitor cells to malignant plasma cells by MafB. *Cell Cycle*. 2012; 11:3896–3900.
36. Vicente-Dueñas C, Romero-Camarero I, González-Herrero I, Alonso-Escudero E, Abollo-Jiménez F, Jiang X, Gutierrez NC, Orfao A, Marín N, Villar LM, Criado MC, Pintado B, Flores T, et al. A novel molecular mechanism involved in multiple myeloma development revealed by targeting MafB to haematopoietic progenitors. *Embo J*. 2012; 31:3704–3717.
37. Vicente-Dueñas C, Fontán L, Gonzalez-Herrero I, Romero-Camarero I, Segura V, Aznar MA, Alonso-Escudero E, Campos-Sanchez E, Ruiz-Roca L, Barajas-Diego M, Sagardoy A, Martinez-Ferrandis JJ, Abollo-Jimenez F, et al. Expression of MALT1 oncogene in hematopoietic stem/progenitor cells recapitulates the pathogenesis of human lymphoma in mice. *Proc Natl Acad Sci USA*. 2012; 109:10534–10539.
38. Velasco-Hernandez T, Vicente-Duenas C, Sanchez-Garcia I, Martin-Zanca D. p53 restoration kills primitive leukemia cells *in vivo* and increases survival of leukemic mice. *Cell Cycle*. 2012; 12:122–132.
39. Yan TD, Wu H, Zhang HP, Lu N, Ye P, Yu FH, Zhou H, Li WG, Cao X, Lin YY, He JY, Gao WW, Zhao Y, et al. Oncogenic potential of retinoic acid receptor-gamma in hepatocellular carcinoma. *Cancer Res*. 2010; 70:2285–2295.
40. Wang W, Yang J, Liu H, Lu D, Chen X, Zenonos Z, Campos LS, Rad R, Guo G, Zhang S, Bradley A, Liu P. Rapid and efficient reprogramming of somatic cells to induced pluripotent stem cells by retinoic acid receptor gamma and liver receptor homolog 1. *Proc Natl Acad Sci U S A*. 2011; 108:18283–18288.
41. Wai HA, Kawakami K, Wada H, Müller F, Vernallis AB, Brown G, Johnson WE. The development and growth of tissues derived from cranial neural crest and primitive mesoderm is dependent on the ligation status of retinoic acid receptor gamma: evidence that retinoic acid receptor gamma functions to maintain stem/progenitor cells in the absence of retinoic acid. *Stem Cells Dev*. 2015; 24:507–519.
42. Cobaleda C, Sanchez-Garcia I. B-cell acute lymphoblastic leukaemia: towards understanding its cellular origin. *Bioessays*. 2009; 31:600–609.
43. Vicente-Duenas C, Perez-Caro M, Abollo-Jimenez F, Cobaleda C, Sanchez-Garcia I. Stem-cell driven cancer:

- “hands-off” regulation of cancer development. *Cell Cycle*. 2009; 8:1314–1318.
44. Vicente-Dueñas C, Hauer J, Ruiz-Roca L, Ingenhag D, Rodríguez-Meira A, Auer F, Borkhardt A, Sánchez-García I. Tumoral stem cell reprogramming as a driver of cancer: Theory, biological models, implications in cancer therapy. *Semin Cancer Biol*. 2015; 32:3–9.
  45. Melo JV, Barnes DJ. Chronic myeloid leukaemia as a model of disease evolution in human cancer. *Nat Rev Cancer*. 2007; 7:441–453.
  46. Pérez-Caro M, Cobaleda C, González-Herrero I, Vicente-Dueñas C, Bermejo-Rodríguez C, Sánchez-Beato M, Orfao A, Pintado B, Flores T, Sánchez-Martín M, Jiménez R, Piris MA, Sánchez-García I. Cancer induction by restriction of oncogene expression to the stem cell compartment. *Embo J*. 2009; 28:8–20.
  47. Green MR, Vicente-Dueñas C, Romero-Camarero I, Long Liu C, Dai B, González-Herrero I, García-Ramírez I, Alonso-Escudero E, Iqbal J, Chan WC, Campos-Sanchez E, Orfao A, Pintado B, et al. Transient expression of Bcl6 is sufficient for oncogenic function and induction of mature B-cell lymphoma. *Nat Commun*. 2014; 5:3904.
  48. Romero-Camarero I, Jiang X, Natkunam Y, Lu X, Vicente-Dueñas C, Gonzalez-Herrero I, Flores T, Garcia JL, McNamara G, Kunder C, Zhao S, Segura V, Fontan L, et al. Germinal centre protein HGAL promotes lymphoid hyperplasia and amyloidosis via BCR-mediated Syk activation. *Nat Commun*. 2013; 4:1338.
  49. Blagosklonny MV. Target for cancer therapy: proliferating cells or stem cells. *Leukemia*. 2006; 20:385–391.
  50. Blagosklonny MV. Cancer stem cell and cancer stemoids: from biology to therapy. *Cancer Biol Ther*. 2007; 6:1684–1690.
  51. Ding L, Ley TJ, Larson DE, Miller CA, Koboldt DC, Welch JS, Ritchey JK, Young MA, Lamprecht T, McLellan MD, McMichael JF, Wallis JW, Lu C, et al. Clonal evolution in relapsed acute myeloid leukaemia revealed by whole-genome sequencing. *Nature*. 2012; 481:506–510.
  52. Walter MJ, Shen D, Ding L, Shao J, Koboldt DC, Chen K, Larson DE, McLellan MD, Dooling D, Abbott R, Fulton R, Magrini V, Schmidt H, et al. Clonal architecture of secondary acute myeloid leukemia. *N Engl J Med*. 2012; 366:1090–1098.
  53. Yoshida K, Sanada M, Shiraishi Y, Nowak D, Nagata Y, Yamamoto R, Sato Y, Sato-Otsubo A, Kon A, Nagasaki M, Chalkidis G, Suzuki Y, Shiosaka M, et al. Frequent pathway mutations of splicing machinery in myelodysplasia. *Nature*. 2011; 478:64–69.
  54. Wang L, Lawrence MS, Wan Y, Stojanov P, Sougnez C, Stevenson K, Werner L, Sivachenko A, DeLuca DS, Zhang L, Zhang W, Vartanov AR, Fernandes SM, et al. SF3B1 and other novel cancer genes in chronic lymphocytic leukemia. *N Engl J Med*. 2011; 365:2497–2506.
  55. Puente XS, Pinyol M, Quesada V, Conde L, Ordóñez GR, Villamor N, Escaramis G, Jares P, Beà S, González-Díaz M, Bassaganyas L, Baumann T, Juan M, et al. Whole-genome sequencing identifies recurrent mutations in chronic lymphocytic leukaemia. *Nature*. 2011; 475:101–105.
  56. Quesada V, Conde L, Villamor N, Ordóñez GR, Jares P, Bassaganyas L, Ramsay AJ, Beà S, Pinyol M, Martínez-Trillos A, López-Guerra M, Colomer D, Navarro A, et al. Exome sequencing identifies recurrent mutations of the splicing factor SF3B1 gene in chronic lymphocytic leukemia. *Nat Genet*. 2012; 44:47–52.
  57. Sakata-Yanagimoto M, Enami T, Yoshida K, Shiraishi Y, Ishii R, Miyake Y, Muto H, Tsuyama N, Sato-Otsubo A, Okuno Y, Sakata S, Kamada Y, Nakamoto-Matsubara R, et al. Somatic RHOA mutation in angioimmunoblastic T cell lymphoma. *Nat Genet*. 2014; 46:171–175.
  58. Morin RD, Mendez-Lago M, Mungall AJ, Goya R, Mungall KL, Corbett RD, Johnson NA, Severson TM, Chiu R, Field M, Jackman S, Krzywinski M, Scott DW, et al. Frequent mutation of histone-modifying genes in non-Hodgkin lymphoma. *Nature*. 2011; 476:298–303.
  59. Okosun J, Bödör C, Wang J, Araf S, Yang CY, Pan C, Boller S, Cittaro D, Bozek M, Iqbal S, Matthews J, Wrench D, Marzec J, et al. Integrated genomic analysis identifies recurrent mutations and evolution patterns driving the initiation and progression of follicular lymphoma. *Nat Genet*. 2014; 46:176–181.
  60. Landau DA, Carter SL, Stojanov P, McKenna A, Stevenson K, Lawrence MS, Sougnez C, Stewart C, Sivachenko A, Wang L, Wan Y, Zhang W, Shukla SA, et al. Evolution and impact of subclonal mutations in chronic lymphocytic leukemia. *Cell*. 2013; 152:714–726.
  61. Sanada M, Suzuki T, Shih LY, Otsu M, Kato M, Yamazaki S, Tamura A, Honda H, Sakata-Yanagimoto M, Kumano K, Oda H, Yamagata T, Takita J, et al. Gain-of-function of mutated C-CBL tumour suppressor in myeloid neoplasms. *Nature*. 2009; 460:904–908.
  62. Kato M, Sanada M, Kato I, Sato Y, Takita J, Takeuchi K, Niwa A, Chen Y, Nakazaki K, Nomoto J, Asakura Y, Muto S, Tamura A, et al. Frequent inactivation of A20 in B-cell lymphomas. *Nature*. 2009; 459:712–716.
  63. Morin RD, Johnson NA, Severson TM, Mungall AJ, An J, Goya R, Paul JE, Boyle M, Woolcock BW, Kuchenbauer F, Yap D, Humphries RK, Griffith OL, et al. Somatic mutations altering EZH2 (Tyr641) in follicular and diffuse large B-cell lymphomas of germinal-center origin. *Nat Genet*. 2010; 42:181–185.
  64. Pasqualucci L, Dominguez-Sola D, Chiarenza A, Fabbri G, Grunn A, Trifonov V, Kasper LH, Lerach S, Tang H, Ma J, Rossi D, Chadburn A, Murty VV, et al. Inactivating mutations of acetyltransferase genes in B-cell lymphoma. *Nature*. 2011; 471:189–195.
  65. Lenz G, Davis RE, Ngo VN, Lam L, George TC, Wright GW, Dave SS, Zhao H, Xu W, Rosenwald A, Ott G,

- Muller-Hermelink HK, Gascoyne RD, et al. Oncogenic CARD11 mutations in human diffuse large B cell lymphoma. *Science*. 2008; 319:1676–1679.
66. Palomero T, Couronné L, Khiabani H, Kim MY, Ambesi-Impiombato A, Perez-Garcia A, Carpenter Z, Abate F, Allegretta M, Haydu JE, Jiang X, Lossos IS, Nicolas C, et al. Recurrent mutations in epigenetic regulators, RHOA and FYN kinase in peripheral T cell lymphomas. *Nat Genet*. 2014; 46:166–170.
  67. Oricchio E, Nanjangud G, Wolfe AL, Schatz JH, Mavrakis KJ, Jiang M, Liu X, Bruno J, Heguy A, Olshen AB, Socci ND, Teruya-Feldstein J, Weis-Garcia F, et al. The Eph-receptor A7 is a soluble tumor suppressor for follicular lymphoma. *Cell*. 2011; 147:554–564.
  68. Lemonnier F, Couronné L, Parrens M, Jaïs JP, Travert M, Lamant L, Tournillac O, Rousset T, Fabiani B, Cairns RA, Mak T, Bastard C, Bernard OA, et al. Recurrent TET2 mutations in peripheral T-cell lymphomas correlate with TFH-like features and adverse clinical parameters. *Blood*. 2012; 120:1466–1469.
  69. Cairns RA, Iqbal J, Lemonnier F, Kucuk C, de Leval L, Jais JP, Parrens M, Martin A, Xerri L, Brousset P, Chan LC, Chan WC, Gaulard P, et al. IDH2 mutations are frequent in angioimmunoblastic T-cell lymphoma. *Blood*. 2012; 119:1901–1903.
  70. Welch JS, Ley TJ, Link DC, Miller CA, Larson DE, Koboldt DC, Wartman LD, Lamprecht TL, Liu F, Xia J, Kandoth C, Fulton RS, McLellan MD, et al. The origin and evolution of mutations in acute myeloid leukemia. *Cell*. 2012; 150:264–278.
  71. Greaves M, Maley CC. Clonal evolution in cancer. *Nature*. 2012; 481:306–313.
  72. Miyamoto T, Weissman IL, Akashi K. AML1/ETO-expressing nonleukemic stem cells in acute myelogenous leukemia with 8;21 chromosomal translocation. *Proc Natl Acad Sci U S A*. 2000; 97:7521–7526.
  73. Miyamoto T, Nagafuji K, Akashi K, Harada M, Kyo T, Akashi T, Takenaka K, Mizuno S, Gondo H, Okamura T, Dohy H, Niho Y. Persistence of multipotent progenitors expressing AML1/ETO transcripts in long-term remission patients with t(8;21) acute myelogenous leukemia. *Blood*. 1996; 87:4789–4796.
  74. Shima T, Miyamoto T, Kikushige Y, Yuda J, Tochigi T, Yoshimoto G, Kato K, Takenaka K, Iwasaki H, Mizuno S, Goto N, Akashi K. The ordered acquisition of Class II and Class I mutations directs formation of human t(8;21) acute myelogenous leukemia stem cell. *Exp Hematol*. 2014; 42:955–965.
  75. Jan M, Snyder TM, Corces-Zimmerman MR, Vyas P, Weissman IL, Quake SR, Majeti R. Clonal evolution of preleukemic hematopoietic stem cells precedes human acute myeloid leukemia. *Sci Transl Med*. 2012; 4:149–118.
  76. Shlush LI, Zandi S, Mitchell A, Chen WC, Brandwein JM, Gupta V, Kennedy JA, Schimmer AD, Schuh AC, Yee KW, McLeod JL, Doedens M, Medeiros JJ, et al. Identification of pre-leukaemic haematopoietic stem cells in acute leukaemia. *Nature*. 2014; 506:328–333.
  77. Walter MJ, Ding L, Shen D, Shao J, Grillo M, McLellan M, Fulton R, Schmidt H, Kalicki-Veizer J, O’Laughlin M, Kandoth C, Baty J, Westervelt P, et al. Recurrent DNMT3A mutations in patients with myelodysplastic syndromes. *Leukemia*. 2011; 25:1153–1158.
  78. Kikushige Y, Ishikawa F, Miyamoto T, Shima T, Urata S, Yoshimoto G, Mori Y, Iino T, Yamauchi T, Eto T, Niho H, Iwasaki H, Takenaka K, et al. Self-renewing hematopoietic stem cell is the primary target in pathogenesis of human chronic lymphocytic leukemia. *Cancer Cell*. 2011; 20:246–259.
  79. Kikushige Y, Miyamoto T. Hematopoietic stem cell aging and chronic lymphocytic leukemia pathogenesis. *Int J Hematol*. 2014; 100:335–340.
  80. Quivoron C, Couronné L, Della Valle V, Lopez CK, Plo I, Wagner-Ballon O, Do Cruzeiro M, Delhommeau F, Arnulf B, Stern MH, Godley L, Opolon P, Tilly H, et al. TET2 inactivation results in pleiotropic hematopoietic abnormalities in mouse and is a recurrent event during human lymphomagenesis. *Cancer Cell*. 2011; 20:25–38.
  81. Couronne L, Bastard C, Bernard OA. TET2 and DNMT3A mutations in human T-cell lymphoma. *N Engl J Med*. 2012; 366:95–96.
  82. Weigert O, Weinstock DM. The evolving contribution of hematopoietic progenitor cells to lymphomagenesis. *Blood*. 2012; 120:2553–2561.
  83. Green MR, Kihira S, Liu CL, Nair RV, Salari R, Gentles AJ, Irish J, Stehr H, Vicente-Dueñas C, Romero-Camarero I, Sanchez-Garcia I, Plevritis SK, Arber DA, et al. Mutations in early follicular lymphoma progenitors are associated with suppressed antigen presentation. *Proc Natl Acad Sci U S A*. 2015; 112:E1116–1125.
  84. Chung SS, Kim E, Park JH, Chung YR, Lito P, Teruya-Feldstein J, Hu W, Beguelin W, Monette S, Duy C, Rampal R, Telis L, Patel M, et al. Hematopoietic stem cell origin of BRAFV600E mutations in hairy cell leukemia. *Sci Transl Med*. 2014; 6:238–271.
  85. Krizhanovsky V, Lowe SW. Stem cells: The promises and perils of p53. *Nature*. 2009; 460:1085–1086.
  86. Bhatla T, Wang J, Morrison DJ, Raetz EA, Burke MJ, Brown P, Carroll WL. Epigenetic reprogramming reverses the relapse-specific gene expression signature and restores chemosensitivity in childhood B-lymphoblastic leukemia. *Blood*. 2012; 119:5201–5210.
  87. Li L, Connelly MC, Wetmore C, Curran T, Morgan JI. Mouse embryos cloned from brain tumors. *Cancer Res*. 2003; 63:2733–2736.

88. Hochedlinger K, Blueloch R, Brennan C, Yamada Y, Kim M, Chin L, Jaenisch R. Reprogramming of a melanoma genome by nuclear transplantation. *Genes & Development*. 2004; 18:1875–1885.

89. Blueloch RH, Hochedlinger K, Yamada Y, Brennan C, Kim M, Mintz B, Chin L, Jaenisch R. Nuclear cloning of embryonal carcinoma cells. *Proc Natl Acad Sci USA*. 2004; 101:13985–13990.
